# Supplementary figures and images for: An Example of Neuro-Glial Commitment and Differentiation of Muse Stem Cells Obtained from Patients with IQSEC2-Related Neural Disorder: A Possible New Cell-Based Disease Model
Source: MDPI journal article supplement (doi:10.3390/cells12070977), 2023-03-23

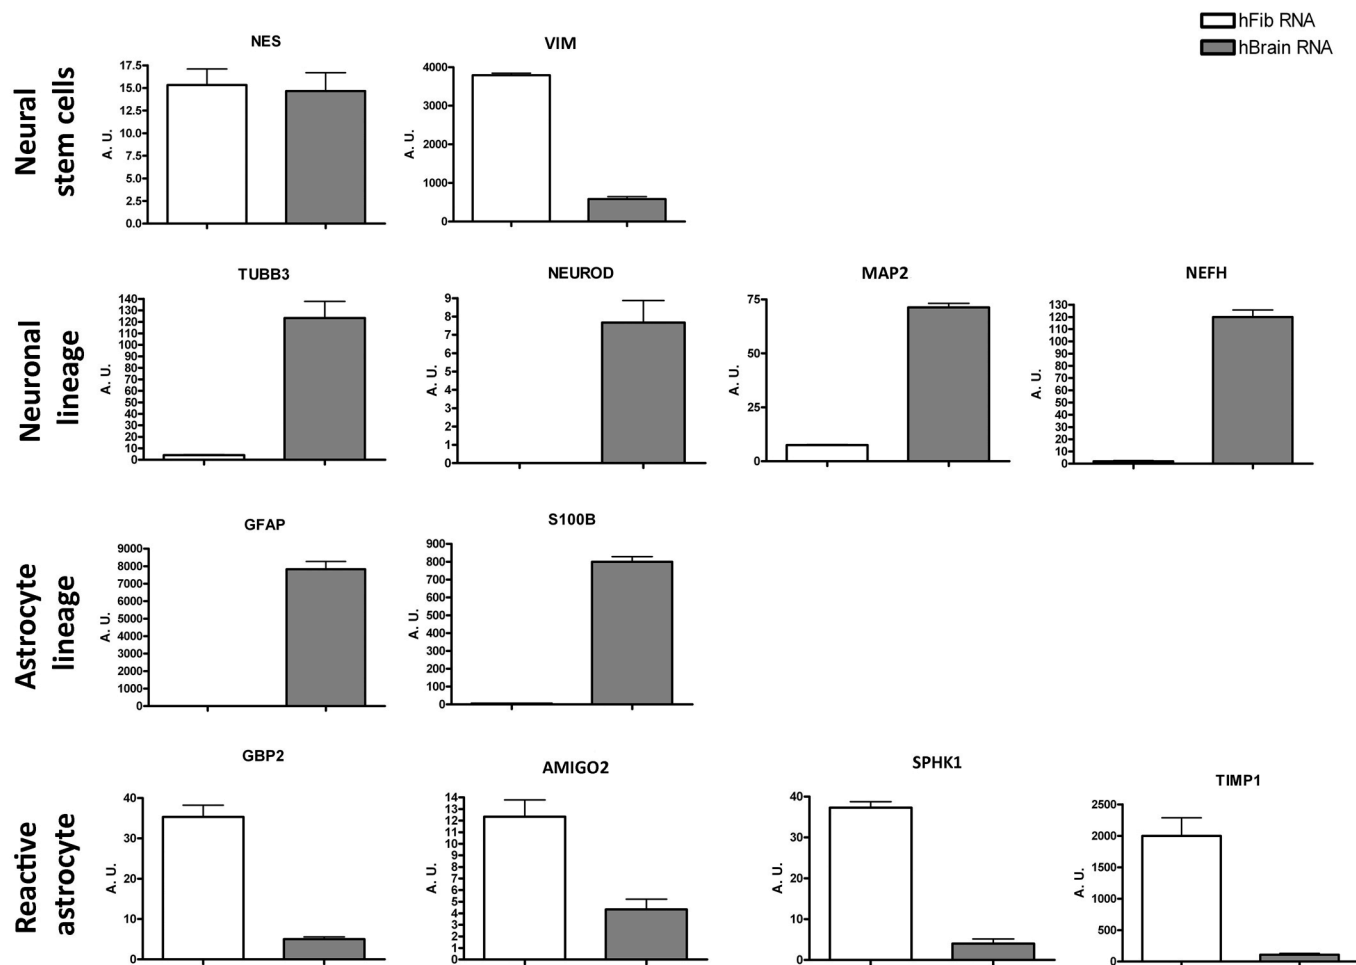

Supplement: s1 [file s1]

MUSE

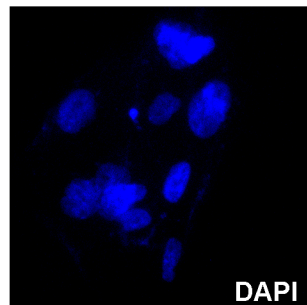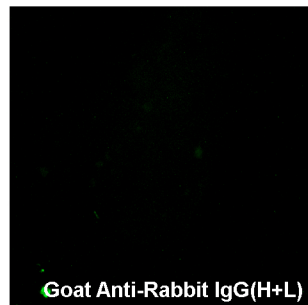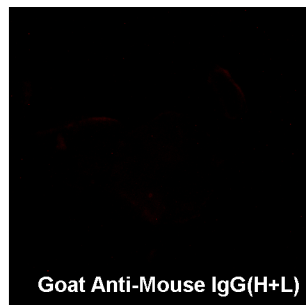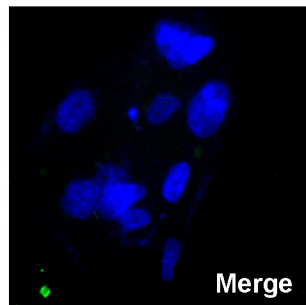

Neural Induction

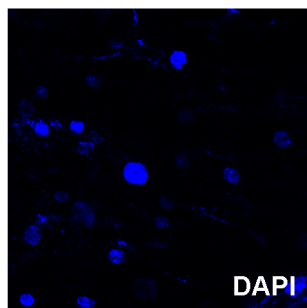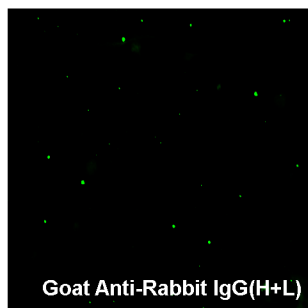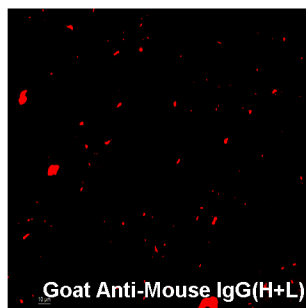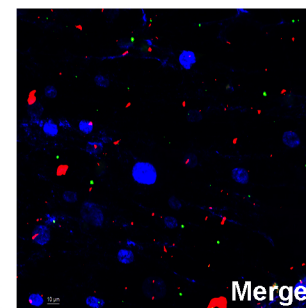

Astrocyte Differentiation

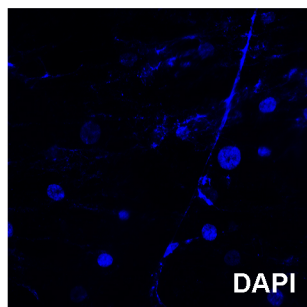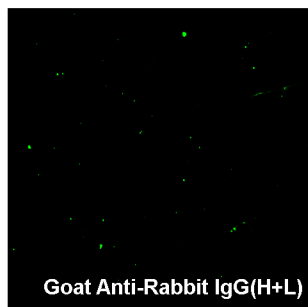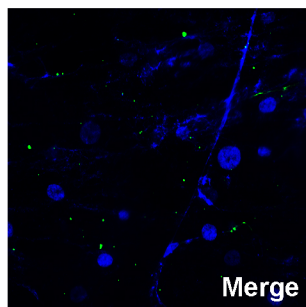

Supplement: s1 [file s1]
